# Supplementary material for: Analgesic Effects and Impairment in Locomotor Activity Induced by Cannabinoid/Opioid Combinations in Rat Models of Chronic Pain
Source: MDPI journal article supplement (doi:10.3390/brainsci10080523), 2020-08-06
Supplement: s1 [file s1]

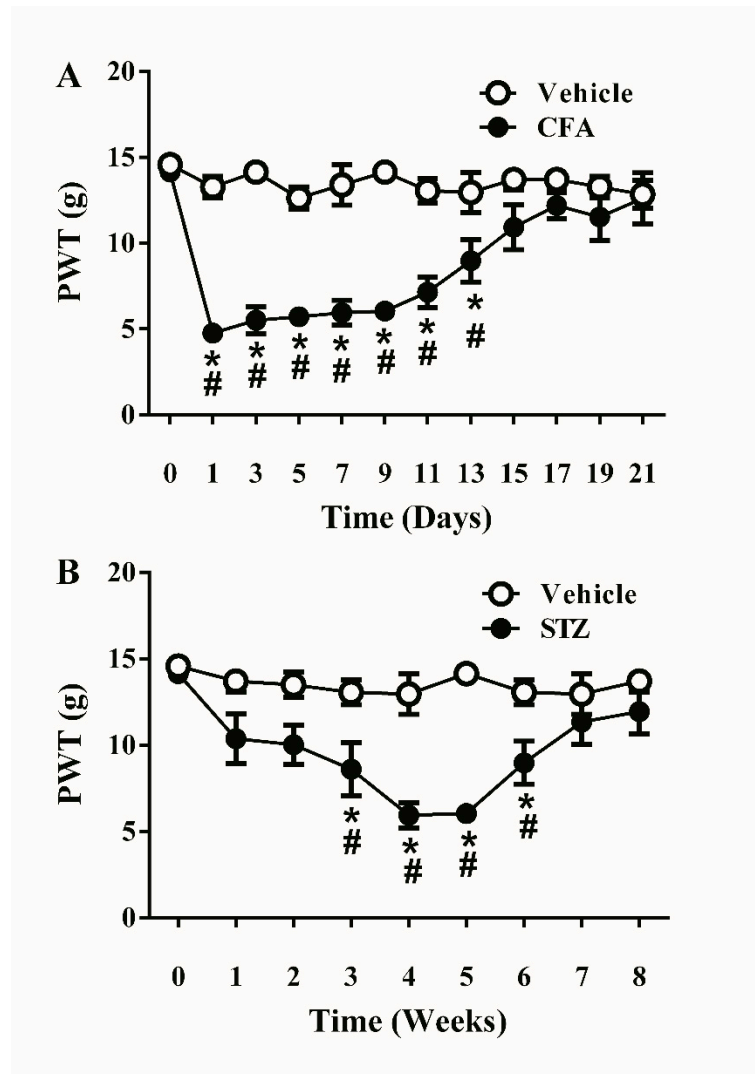

**Figure S1.** Reduction of paw withdrawal threshold (PWT) following injection of Complete Freund's adjuvant (CFA) or streptozotocin (STZ), **A.** Effects of intraplantar injection of CFA on Mechanical PWT. PWT was significantly decreased in CFA-treated rats compared to vehicle-treated rats. Two-way ANOVA revealed the following results: significant main effect of treatment [ $F(1,144) = 182.8$ ;  $p < 0.0001$ ], significant main effect of time [ $F(11,144) = 8.5$ ;  $p < 0.0001$ ], and significant main treatment X time interaction [ $F(11,144) = 7.378$ ;  $p < 0.0001$ ]. # indicate significant difference between groups. \* indicates significant difference vs. day 0 within group. All data represent mean  $\pm$  SEM of 8 rats. (PWT = paw withdrawal threshold in grams), **B.** Effects of intraperitoneal injection of STZ on Mechanical PWT. PWT was significantly decreased in STZ-treated rats compared with vehicle-treated rats. Two-way ANOVA revealed the following results: significant main effect of treatment [ $F(1,108) = 67.87$ ;  $p < 0.0001$ ], significant main effect of time [ $F(8,108) = 4.547$ ;  $p < 0.0001$ ], and significant main treatment X time interaction [ $F(8,108) = 3.254$ ;  $p < 0.0001$ ]. # indicate significant difference between groups. \* indicates significant difference vs. day 0 within group. All data represent mean  $\pm$  SEM of 7 rats. (PWT = paw withdrawal threshold in grams).
